# Supplementary material for: Activating dynamic atomic-configuration for single-site electrocatalyst in electrochemical CO2 reduction
Source: PubMed Central journal article supplement (PMC10462635; doi:10.1038/s41467-023-40970-y), 2023-08-28
Supplement: 41467_2023_40970_MOESM2_ESM.pdf [file 41467_2023_40970_MOESM2_ESM.pdf]

### **Description of Additional Supplementary Files**

**Supplementary Movie 1:** Dynamic restructuring of N-Cu SAC at -1.1 V vs RHE in electrolyte.

**Supplementary Movie 2:** N-Cu SAC at -1.1 V vs RHE in electrolyte for longer duration.

**Supplementary Movie 3:** N-Cu SAC at -0.6 V vs RHE in electrolyte.

**Supplementary Movie 4:** Control experiment without applying cathodic potentials in electrolyte.

**Supplementary Movie 5:** Control experiment without introducing electrolyte.

**Supplementary Movie 6:** Effect of electrolyte flow on the bubble movement during reaction.
